# Supplementary material
Source: PubMed Central journal article supplement (PMC7753324)
Supplement: HEP-74-322-s001.pdf [file HEP-74-322-s001.pdf]

**Supplemental Table 1.** Diagnosis of cirrhosis was defined by any of the ICD9/10 codes listed under #1 (cirrhosis) recorded at least twice OR any of the codes listed under #1 recorded only once PLUS at least one code recorded in #2 to #8 (complications of cirrhosis)

| Diagnosis                                                                        | ICD9          |                                                              | ICD10   |
|----------------------------------------------------------------------------------|---------------|--------------------------------------------------------------|---------|
| <b>1. CIRRHOSIS</b>                                                              |               |                                                              |         |
| Alcoholic Cirrhosis Of Liver                                                     | 571.2         | Alcoholic cirrhosis without ascites                          | K70.30  |
| Cirrhosis Of Liver Without Mention Of Alcohol                                    | 571.5         | Other cirrhosis of liver                                     | K74.69  |
|                                                                                  |               | Unspecified cirrhosis of the liver                           | K74.60  |
|                                                                                  |               | Pigmentary cirrhosis of the liver                            | E83.110 |
|                                                                                  |               | Cirrhosis (of liver) with toxic liver disease                | K71.7   |
|                                                                                  |               | Alcoholic cirrhosis with ascites                             | K70.31  |
| <b>2. VARICES NO BLEEDING</b>                                                    |               |                                                              |         |
| Esophageal Varices Without Mention Of Bleeding                                   | 456.1         | Esophageal varices, no bleeding                              | I85.00  |
| Esophageal Varices In Diseases Classified Elsewhere, Without Mention Of Bleeding | 456.21        | Gastric Varices, no bleeding                                 | I86.40  |
|                                                                                  |               | Secondary esophageal varices, no bleeding                    | I85.10  |
| <b>3. VARICES WITH BLEEDING</b>                                                  |               |                                                              |         |
| Esophageal Varices With Bleeding                                                 | 456.0         | Esophageal varices, with bleeding                            | I85.01  |
| Esophageal Varices In Diseases Classified Elsewhere, With Bleeding               | 456.20        | Gastric Varices, with bleeding                               | I86.41  |
|                                                                                  |               | Secondary esophageal varices, with bleeding                  | I85.11  |
| <b>4. ASCITES</b>                                                                |               |                                                              |         |
| ascites                                                                          | 789.5         | Alcoholic cirrhosis with ascites                             | K70.31  |
| Other ascites                                                                    | 789.60        | ascites in alcoholic hepatitis                               | K70.11  |
| Non-malignant ascites                                                            | <b>789.59</b> | ascites in toxic liver disease with chronic active hepatitis | K71.51  |
|                                                                                  |               | Other ascites                                                | R18.8   |
| <b>5. SPONTANEOUS BACTERIAL PERITONITIS</b>                                      |               |                                                              |         |
|                                                                                  | 567.23        |                                                              | K65.2   |
| <b>6. ENCEPHALOPATHY</b>                                                         |               |                                                              |         |
| encephalopathy                                                                   | 572.2         | Hepatic failure, unspecified with coma                       | K72.91  |
| Chronic hepatitis C with hepatic coma                                            | 070.44        | Encephalopathy, unspecified                                  | G93.40  |
|                                                                                  |               | Chronic failure with coma                                    | K72.11  |
| <b>7. HEPATORENAL SYNDROME</b>                                                   |               |                                                              |         |
| Hepatorenal syndrome                                                             | 572.5         |                                                              | K76.7   |
| <b>8. HEPATOPULMONARY SYNDROME</b>                                               |               |                                                              |         |
|                                                                                  | 573.5         |                                                              | K76.81  |

**Supplemental Table 2.** Comorbid Conditions in VA patients tested for SARS-CoV-2, by cirrhosis and SARS-CoV-2 status:

|                          | NO CIRRHOSIS                 |                              | CIRRHOSIS                    |                              |
|--------------------------|------------------------------|------------------------------|------------------------------|------------------------------|
|                          | SARS-CoV-2 Negative<br>C0-S0 | SARS-CoV-2 Positive<br>C0-S1 | SARS-CoV-2 Negative<br>C1-S0 | SARS-CoV-2 Positive<br>C1-S1 |
|                          | N=75,315                     | N=9826                       | N=3301                       | N=305                        |
| Diabetes                 | 32.6                         | 37.5                         | 51.9                         | 57.4                         |
| Cancer                   | 25.2                         | 22.1                         | 42.4                         | 40.7                         |
| Hypertension             | 58.8                         | 61.6                         | 80.5                         | 80.3                         |
| Coronary Artery Disease  | 22.9                         | 21.5                         | 34.7                         | 31.1                         |
| Congestive heart failure | 12.4                         | 10.6                         | 27.4                         | 27.2                         |
| Cerebrovascular Disease  | 3.4                          | 3.4                          | 5.2                          | 7.5                          |
| Dialysis                 | 3.0                          | 3.2                          | 9.7                          | 10.2                         |
| Chronic kidney disease   | 16.7                         | 17.9                         | 31                           | 36.7                         |
| Asthma                   | 7.6                          | 7.4                          | 7.1                          | 4.6                          |
| COPD                     | 24.2                         | 18.5                         | 38.9                         | 26.9                         |
| Obstructive sleep apnea  | 28.8                         | 26.6                         | 31.2                         | 35.1                         |
| Obesity Hypoventilation  | 0.8                          | 0.8                          | 1.2                          | 1                            |
| Alcohol Dependence       | 15.5                         | 10.3                         | 40.2                         | 25.2                         |
| Drug Dependence          | 9.8                          | 5.5                          | 19.8                         | 15.1                         |
| Hyperlipidemia           | 54.3                         | 55.5                         | 60.8                         | 59                           |
| Smoking                  |                              |                              |                              |                              |
| Never                    | 28.8                         | 36.4                         | 19.5                         | 23.3                         |
| Former                   | 36.9                         | 39.9                         | 43.1                         | 52.8                         |
| Current                  | 21.5                         | 11.1                         | 29.5                         | 14.4                         |
| Unknown                  | 12.8                         | 12.7                         | 7.9                          | 9.5                          |

<sup>a</sup> Categorized by number of COVID-19 related deaths per million on 6/11/20<sup>32</sup>: <130 (AK, AR, CA, HI, ID, KS, KY, ME, MT, NC, ND, NE, OK, OR, PR, SC, SD, TN, TX, UT, VT, WI, WV, WY), 130-350 (AL, AZ, CO, FL, GA, IA, MN, MO, MS, NH, NM, NV, OH, VA, WA), 350-700 (DE, IL, IN, LA, MD, MI, PA), >700 (CT, MA, NJ, NY, RI)

<sup>b</sup> Measured -10/+5 days from index date in hospitalized patients only

**Supplemental Table 3.** 30-day incidence of hospitalization and mechanical ventilation, with death as a competing risk

|                                                                 | No Cirrhosis        | No Cirrhosis        | No Cirrhosis | Cirrhosis           | Cirrhosis           | Cirrhosis |
|-----------------------------------------------------------------|---------------------|---------------------|--------------|---------------------|---------------------|-----------|
|                                                                 | SARS-CoV-2 Negative | SARS-CoV-2 Positive | P-value      | SARS-CoV-2 Negative | SARS-CoV-2 Positive | P-value   |
|                                                                 | N=75,315            | N=9826              |              | N=3301              | N=305               |           |
| Hospitalization with death as a competing risk(%)               | 33.4                | 33.5                | 0.91         | 58.1                | 53.2                | 0.1       |
| Hospitalization with death as a competing risk (%) <sup>a</sup> | 28.3                | 29.7                | 0.02         | 51.9                | 49.4                | 0.4       |
| Ventilation with death as a competing risk (%)                  | 1.6                 | 6.4                 | < 0.001      | 3.5                 | 12.6                | < 0.001   |

<sup>a</sup> Limited to hospitalization that occurred on or after the SARS-CoV-2 testing date.
